# Supplementary material for: Electrochemical Corrosion Prevention in Oilfield Wastewater for Effective Dissolved Oxygen Removal Using a Novel Upflow Bioelectrochemical System
Source: Hindawi journal article supplement (doi:10.1155/2019/6292509), 2019-06-27
Supplement: f1 [file 6292509.f1.docx]

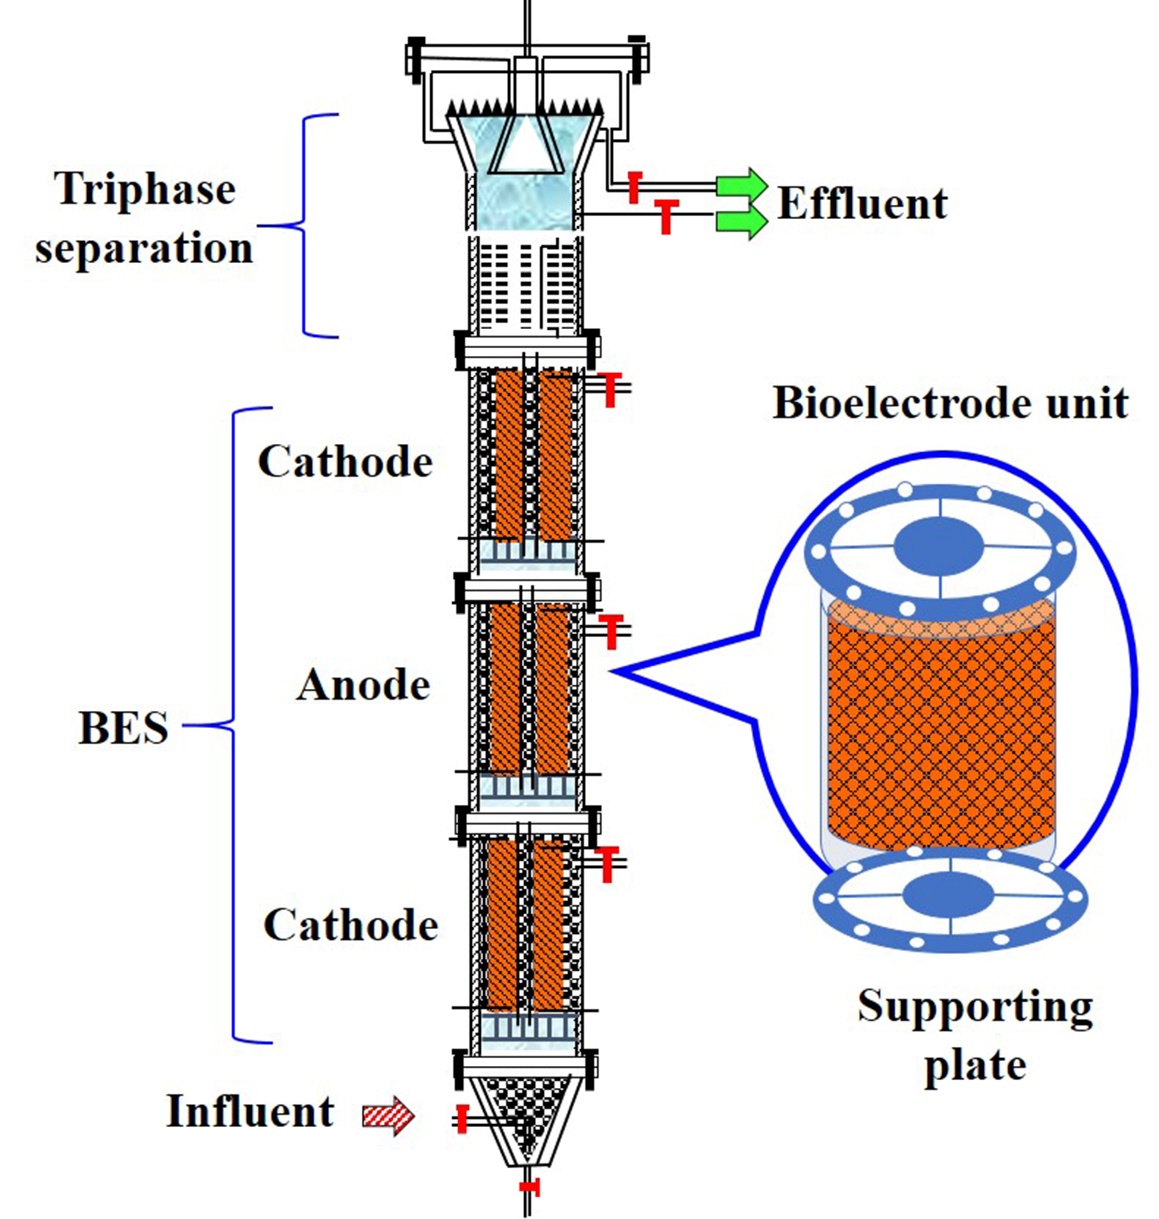


The membrane-less three-electrode (cathode-anode-cathode) upflow reactor for oilfield sewage micro-electrocatalytic deoxygenation. The reactor was assembled with an inner diameter of 5 cm and a height of 100 cm and an effective volume of 2 L. The anode was made of carbon brush electrode (carbon fiber, radius 2.5 cm, length 20 cm); cathode was made of nickel foam (Ni>99.8%)
